# Supplementary material
Source: PubMed Central journal article supplement (PMC10992090)
Supplement: 262_2023_3489_MOESM1_ESM.pdf [file 262_2023_3489_MOESM1_ESM.pdf]

**Immune-related adverse events and disease outcomes after the third dose of SARS-CoV-2 mRNA-BNT162b2 vaccine in cancer patients receiving immune checkpoint inhibitors**

*Supplemental material*

Supplementary Table 1. Baseline patient characteristics

Supplementary Fig. 1 ROC curve analysis of anti-RBD-S1 IgG titers on DCB in the subgroup of lung cancer patients

Supplementary Fig. 2 Time-to-event depending on clinical benefit outcome

Supplementary Fig. 3 Time-to-event depending on antibody response level in subgroup of lung cancer patients

Supplementary Table 1. Baseline patient characteristics

|                                                         | All patients,<br>N=56 (100%) |
|---------------------------------------------------------|------------------------------|
| Mean age, years (standard deviation)                    | 65.9 (10.0)                  |
| Sex                                                     |                              |
| - Female                                                | 16 (28.6%)                   |
| - Male                                                  | 40 (71.4%)                   |
| ECOG PS                                                 |                              |
| - 0                                                     | 17 (30.4%)                   |
| - 1                                                     | 39 (69.6%)                   |
| Tumor type                                              |                              |
| - NSCLC                                                 | 31 (55.6%)                   |
| - SCLC                                                  | 6 (10.5%)                    |
| - Kidney                                                | 7 (12.5%)                    |
| - Skin (Melanoma, Merkel-cell, Squamous cell carcinoma) | 7 (12.5%)                    |
| - Urothelial                                            | 4 (7.1%)                     |
| - Gastrointestinal                                      | 1 (1.8%)                     |
| Extent of disease                                       |                              |
| - Metastatic                                            | 56 (100%)                    |
| Treatment setting                                       |                              |
| - metastatic, first line                                | 36 (64.3%)                   |
| - metastatic, second or later line                      | 20 (35.7%)                   |
| Number of metastatic sites                              |                              |
| - 1                                                     | 23 (41.1%)                   |
| - $\geq 2$                                              | 33 (58.9%)                   |
| CNS metastases                                          |                              |
| - no                                                    | 44 (78.6%)                   |
| - yes                                                   | 12 (21.4%)                   |
| Liver metastases                                        |                              |
| - no                                                    | 50 (89.3%)                   |
| - yes                                                   | 6 (10.7%)                    |
| Bone metastases                                         |                              |
| - no                                                    | 39 (69.6%)                   |
| - yes                                                   | 17 (30.4%)                   |
| Weight loss <sup>a</sup>                                |                              |
| - <5%                                                   | 39 (69.6%)                   |
| - $\geq 5\%$                                            | 17 (30.4%)                   |
| PD-L1 TPS                                               |                              |
| - $\geq 1\%$                                            | 35 (62.5%)                   |
| - <1%                                                   | 16 (28.5%)                   |

|                                                                            |                  |
|----------------------------------------------------------------------------|------------------|
| - unknown                                                                  | 5 (8.9%)         |
| Corticosteroid therapy <sup>b</sup>                                        | 8 (16.7%)        |
| ICI-based treatment                                                        |                  |
| - Pembrolizumab                                                            | 25 (44.6%)       |
| - Nivolumab                                                                | 21 (37.5%)       |
| - Atezolizumab                                                             | 6 (10.7%)        |
| - Durvalumab                                                               | 2 (3.6%)         |
| - Avelumab                                                                 | 1 (1.8%)         |
| - Cemiplimab                                                               | 1 (1.8%)         |
| Duration (months) of ICI treatment, median (IQR)                           | 19.8 (10.5-26.9) |
| Duration (months) of ICI treatment before third vaccine dose, median (IQR) | 8.4 (5.1-16.1)   |
| Duration (months) of ICI treatment after third vaccine dose, median (IQR)  | 4.6 (1.5-18.8)   |

Abbreviations: SD, standard deviation; ECOG PS, Eastern Cooperative Oncology Group Performance Status; CNS, central nervous system; NSCLC, non-small-cell lung cancer; SCLC, small-cell lung cancer; PD-L1 TPS, programmed cell death-ligand 1 tumor proportion score; ICI, immune checkpoint inhibitor; IQR, interquartile range.

<sup>a</sup> weight loss indicates body weight variation in the 28 days preceding the third dose of vaccine; <sup>b</sup> corticosteroid therapy indicates  $\geq 10$  mg prednisone equivalent daily for at least 7 days in the 28 days preceding the third dose of vaccine.

Supplementary Fig. 1 ROC curve analysis of anti-RBD-S1 IgG titers on DCB in the subgroup of lung cancer patients

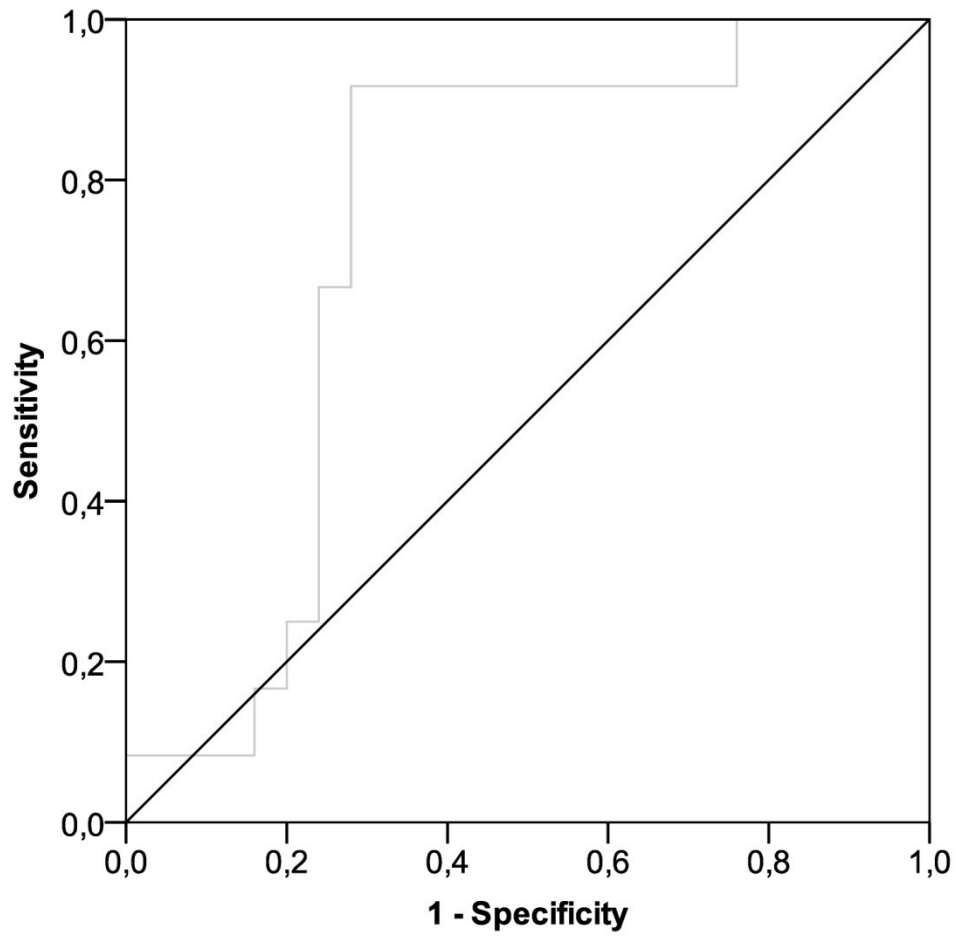

AUC relative value: AUC 0.73 (95% CI 0.56-0.90),  $p=0.021$ .

Abbreviations: ROC, receiver operating characteristic; RBD-S1, receptor-binding domain of the SARS-CoV-2 Spike protein; DCB, durable clinical benefit; AUC, area under the curve; CI, confidence interval.

Supplementary Fig. 2 Time-to-event depending on clinical benefit outcome

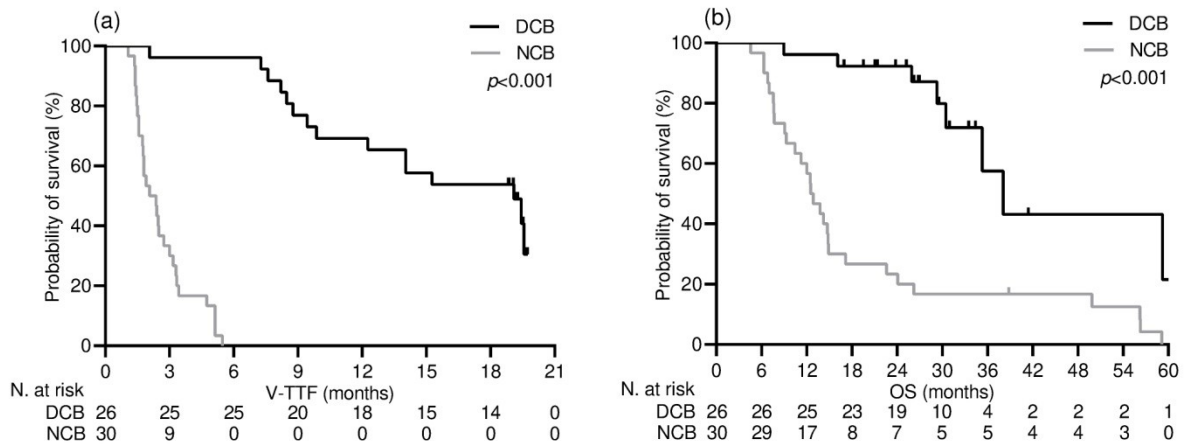

(a) Vaccine-related time-to-treatment failure and (b) overall survival: DCB (durable clinical benefit) vs. NCB (no clinical benefit)

Supplementary Fig. 3 Time-to-event depending on antibody response level in subgroup of lung cancer patients

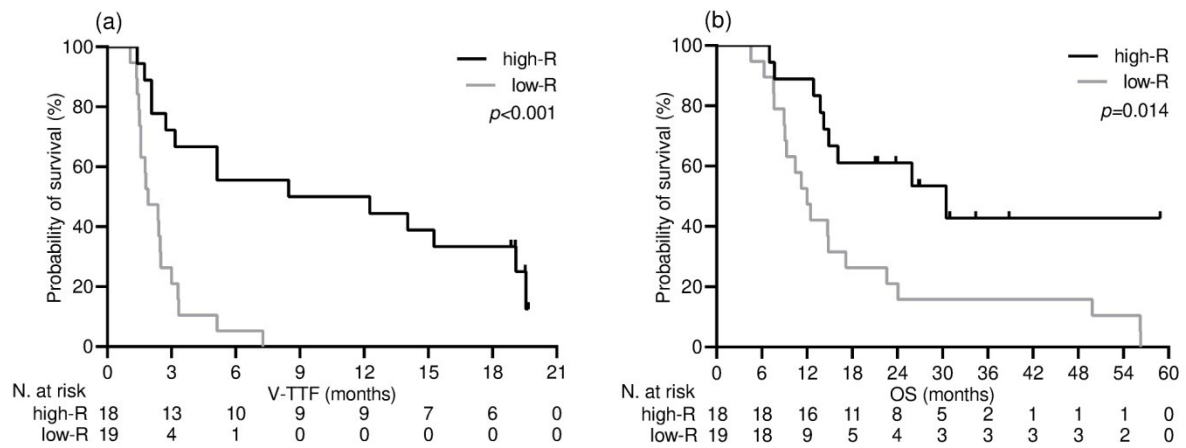

(a) Vaccine-related time-to-treatment failure and (b) overall survival: High-R (subgroup of patients with an anti-RBD-S1 IgG titer  $\geq 486$  BAU/mL after the third dose of vaccine) vs. Low-R (subgroup of patients with an anti-RBD-S1 IgG titer  $< 486$  BAU/mL after the third dose of vaccine).

Abbreviations: RBD-S1, receptor-binding domain of the SARS-CoV-2 Spike protein; BAU, binding antibody unit.
